# Supplementary material for: Highly Dispersed Pt-Incorporated Mesoporous Fe2O3 for Low-Level Sensing of Formaldehyde Gas
Source: MDPI journal article supplement (doi:10.3390/nano13040659), 2023-02-08
Supplement: s1 [file s1]

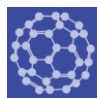

## Supplementary Information

# Highly Dispersed Pt-Incorporated Mesoporous Fe<sub>2</sub>O<sub>3</sub> for Low-Level Sensing of Formaldehyde Gas

Seung Jin Jeon <sup>1,2,†</sup>, Kyung Hee Oh <sup>3,4,†</sup>, Youngbo Choi <sup>2,\*</sup>, Ji Chan Park <sup>3,5,\*</sup> and Hyung Ju Park <sup>1,\*</sup>

<sup>1</sup> Electronics and Telecommunications Research Institute (ETRI), 218 Gajeong-ro, Yuseong-gu, Daejeon 34129, Republic of Korea

<sup>2</sup> Department of Safety Engineering, Chungbuk National University, Cheongju 28644, Republic of Korea

<sup>3</sup> Clean Fuel Research Laboratory, Korea Institute of Energy Research, Daejeon 34129, Republic of Korea

<sup>4</sup> Department of Chemistry, Korea University, Seoul 02841, Republic of Korea

<sup>5</sup> Energy Engineering, University of Science and Technology, Daejeon 34113, Republic of Korea

\* Correspondence: ybc@cbnu.ac.kr (Y.C.); jcpark@kier.re.kr (J.C.P.); park77@etri.re.kr (H.J.P.)

† These authors contributed equally to this work.

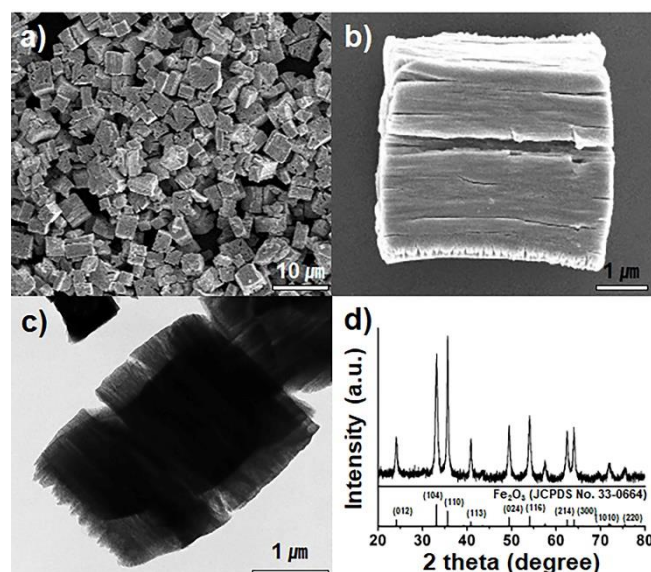

**Figure S1.** (a) SEM and (b) magnified SEM images, (c) TEM image, and (d) XRD spectrum of the m-Fe<sub>2</sub>O<sub>3</sub>.

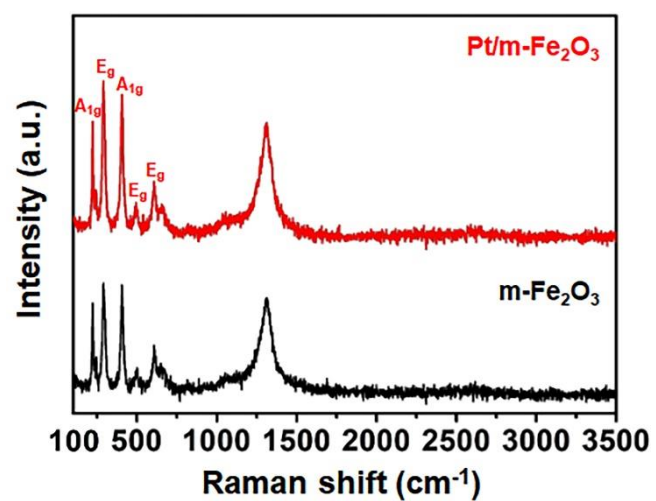

Figure S2. Raman spectra of the m-Fe<sub>2</sub>O<sub>3</sub> and 0.2wt% Pt/m-Fe<sub>2</sub>O<sub>3</sub>.

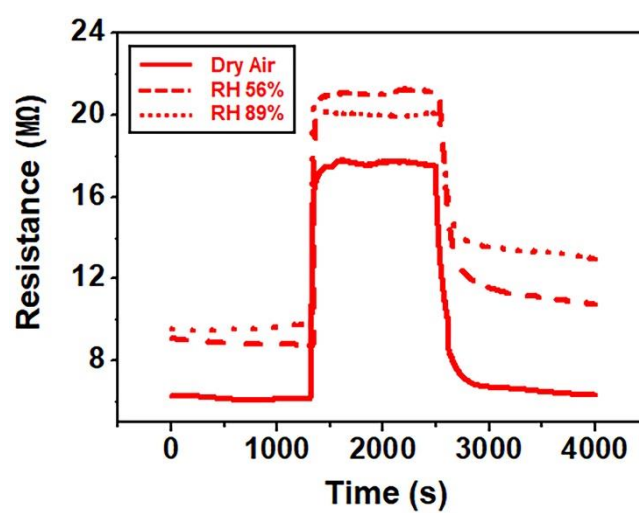

**Figure S3.** Resistance changes of the Pt/m-Fe<sub>2</sub>O<sub>3</sub> under different relative humidity (Dry air, RH 56 % and RH 89 %) with respect to the 200 ppb HCHO gas at 300 °C.

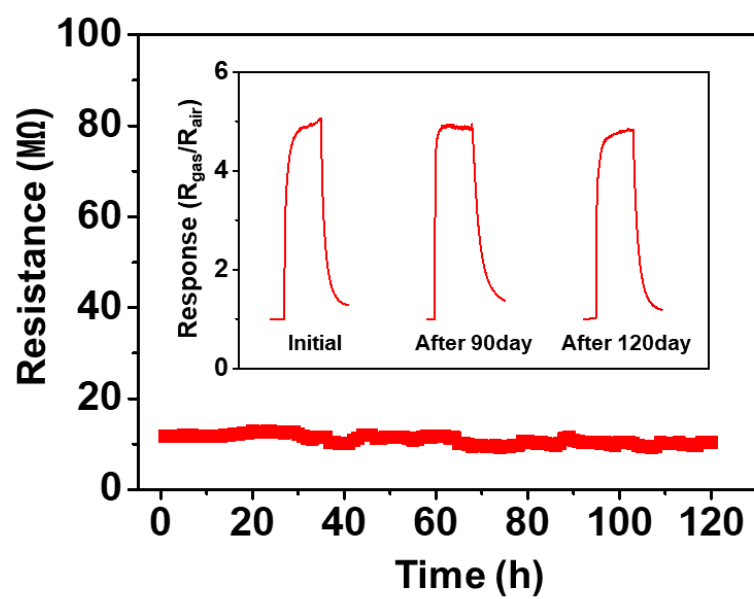

**Figure S4.** Base resistance of Pt-Fe<sub>2</sub>O<sub>3</sub> in air condition for 120 h consecutively. (The insets were HCHO gas response of Pt-Fe<sub>2</sub>O<sub>3</sub> toward 500 ppb HCHO gas at the initial test, after 90 days and 120 days at 275 °C).
